# Supplementary material for: Clinical Characteristics and Surgical Safety in Congenital Cataract Eyes with Three Pathological Types of Posterior Capsule Abnormalities
Source: J Ophthalmol. 2020 Mar 16;2020:6958051. doi: 10.1155/2020/6958051 (PMC7125490; doi:10.1155/2020/6958051)
Supplement: Supplementary Materials — Video 1: a brief surgical procedure for a congenital cataract (CC) eye with persistent fetal vasculature (PFV, combined) and posterior capsule defect (PCD, type III). Firstly, the anterior capsulotomy was performed, and the major cortex was removed with vitrector. Then, the fetal vessels from anterior segments and the central dense plaque opacity were present clearly. A large fetal vessel from posterior segments and a significant PCD appear immediately after peeling off the dense fibrous membrane. At last, posterior capsulotomy and anterior vitrectomy were performed, and it was left aphakia. Video 2: a brief surgical procedure for a congenital cataract (CC) eye combined with posterior capsule defect (PCD, type I). A large and irregular pre-existing PCD was shown after anterior capsulotomy and central cortex being removed with vitrector. Then, the irregular PCD was trimmed to be a round one using the vitrector. At last, the anterior vitrectomy was performed without primary intraocular lens (IOL) implantation. Video 3: a brief surgical procedure for a congenital cataract (CC) eye combined with posterior lenticonus (PLC). The huge PLC turned up after the anterior capsulotomy and cortex being removed with vitrector. After that, a single-piece IOL was implanted in the capsule bag. Then, the capsulotomy of PLC and anterior vitrectomy were performed immediately. [file 6958051.f1.zip]

Archive with 3 entries (3 files):
- 6958051.f1/mat.6958051.v1 (1).mp4
- 6958051.f1/Vedio 2.avi
- 6958051.f1/Vedio 3.avi
